# Supplementary material
Source: Elsevier journal article supplement (https://www.sciencedirect.com/science/article/pii/S1413355521000356)
Supplement: mmc1 [file S1413355521000356:mmc1.docx]

**Supplementary material**: The cover and some illustrations of the final version of the comic book “A Journey to Learn about Pain.”

**
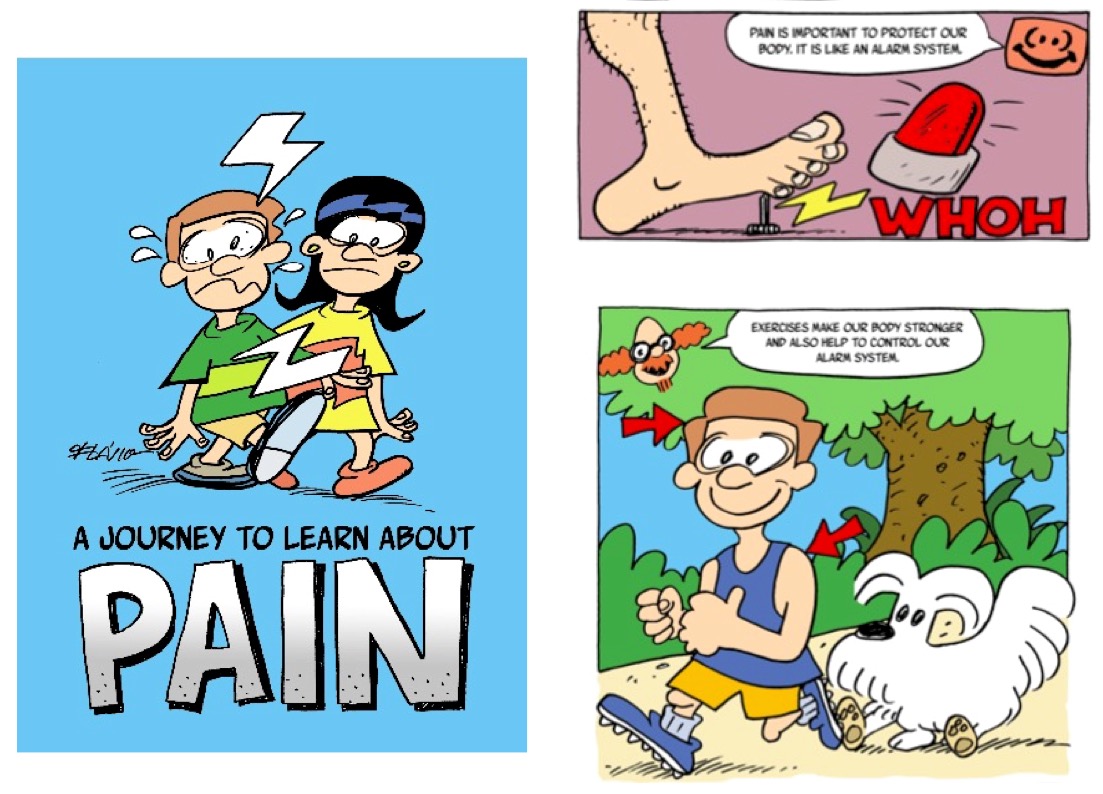
**
